# Supplementary material
Source: Springer Nature journal article supplement (https://www.springermedizin.de/resource/supplementary/13063_2010_470_MOESM2_ESM.pdf/9618286)

Year: 2000

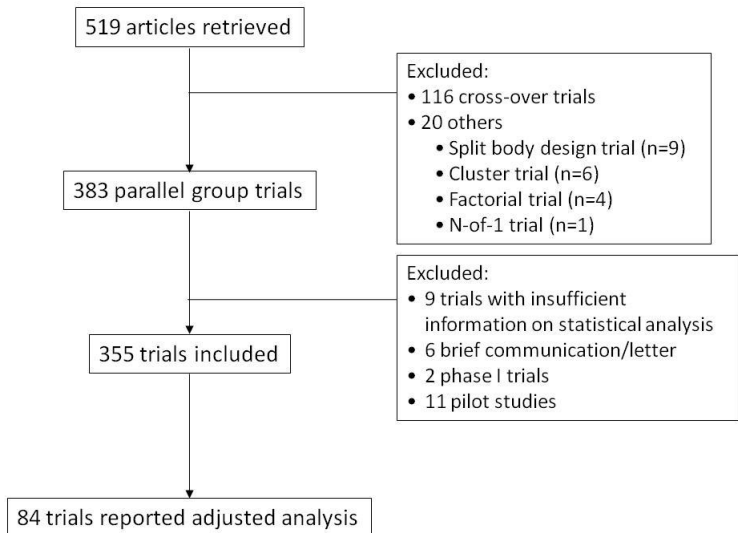

Year: 2006

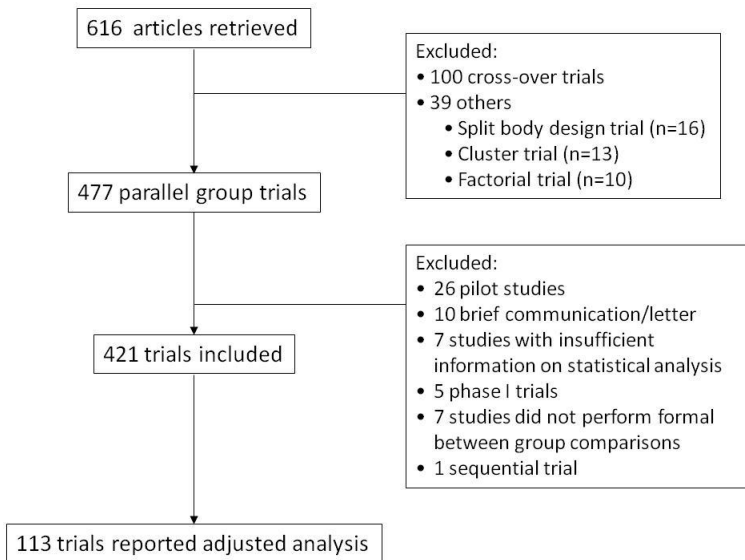

Supplement: MOESM2 [file 9618286]
